# Supplementary material
Source: MDPI journal article supplement (https://www.mdpi.com/2079-9276/8/1/53)
Supplement: s1 [file s1]

Supplementary Material 1- Full Reference List of the first set of literatures reviewed.

1. Ogunjobi, K.M.; Adetogun, A.C.; Shofidiya, S.A. Investigation of pulping potentials of waste from conversion of *Anogeissus leiocarpus*. *J. Polym. Text. Eng.* **2014**, *1*, 26–30.
2. Osadero, A.O. Strategies towards self Sufficiency in Long fibre pulp Production in Nigeria. *Niger. J. For.* **1995**, *24*, 16–20.
3. Nkaa, F.A.; Ogonnaya, C.I, Onyike, N.B. Effect of differential irrigation on physical and Histochemical properties of kenaf (*Hibiscus cannabinus* L.) grown in the field in eastern Nigeria. *Afr. J. Agric. Res.* **2007**, *2*, 252–260.
4. Udohitinah, J.S.; Oluwadare, A.O. Pulping properties of Kraft pulp of Nigerian-grown Kenaf (*Hibiscus Cannabinus*, L). *Bioresources* **2011**, *6*, 751–761.
5. Ogunsile, B.O.; Uwajeh, C.F. Evaluation of pulp and paper potentials of a Nigerian grown *Bambusa vulgaris*. *World Applied sciences Journal* 2009, *6*. 536-541.
6. Oriola, E.O. Forestry for sustainable development in Nigeria. *Int. J. Afr. Stud.* **2009**, *1*, 11–16.
7. Edomah, N. Governing sustainable industrial energy use: Energy transitions in Nigeria’s manufacturing sector. *Journal of cleaner production* 2019.210, 420-629.
8. Fuwape, J.A.; Lucas, E.B. Wood Residues as fuel in Pulp Paper manufacturing Industries in Nigeria. *Alternative Energy systems* 1984, pp117-124.
9. Onwualu, A.P. Manufacturing of raw material processing equipment and machinery in Nigeria. 2008. A paper presented at the Annual Engineering Conference of Nigerian Society of Engineers (NSE). YANKARI, Nigeria.
10. Ndukwe, N.A., Jenmi, F.O.; Okiei, W.O.; Alo, B.I. Comparative study of percentage yield of pulp from various Nigerian wood species using the kraft process. *Afr. J. Environ. Sci. Technol.* **2009**, *3*, 21–25.
11. Akpabio, U.D.; Akpakpan, A.E. Pulp and paper from Agricultural waste: Plantain *Pseudostem* wastes and screw pine leaves. *Int. J. Mod. Chem.* **2012**, *2*, 100–107.
12. Onilude, M.A. Pulp and paper industry: A neglected goldmine in Nigeria. An inaugural lecture delivered at University of Ibadan on 2/6/2011. University of Ibadan, Ibadan, Nigeria.
13. Egbewole, Z.T.; Rotowa, O.J. Effects of declining Paper industry on Nigeria Economy and the way forward. *Am. J. Agric. For.* **2017**, *5*, 181–187.
14. Ogunwusi, A.A. Towards Optimizing pulp and paper production capacities in Nigeria. *Int. J. Sci. Technol.* **2013**, *2*, 27–44.
15. Onwualu, A.P. Pulp and Paper sector in Nigeria: Challenges and prospects. Paper presented at the Annual General meeting of Manufacturing Association of Nigeria (MAN), MAN house, Lagos, July 2010.
16. Ogunjinmi, A.A.; Ijeomah, H.M.; Aiyeloja, A.A. Socio-economic importance of Bamboo (*Bambusa vulgaris*) in Borgu local government area of Niger state, Nigeria. *J. Sustain. Dev. Afr.* **2009**, *10*, 284–298.
17. Ogunwusi, A.A. The forest products industry in Nigeria. *African Research Review* 2012, *6*, pp15.
18. Ogunwusi, A.A., Onwualu, A.P. impact of privatization of Primary pulp and paper mills on performance of the pulp and paper sector in Nigeria. *Dev. Ctry. Stud.* **2013**, *3*, 109–119.
19. Onwualu, A.P. Developing agricultural raw materials for wealth creation in Nigeria. At the 3<sup>rd</sup> forum of the Laureates of Nigerian National Order of merit (NNOM). Merit House Complex Abuja. December 1-2, 2009.
20. Adeoti, J.O. Technology and the Environment in Sub-Sahara Africa: Emerging Trends in Nigerian manufacturing Industry 2002, London, Routledge. pp288.
21. Umeh, L.I.; Harou, P.A. Forestry Resources issues and element of strategy for Nigeria. In Conservation of west and central African rainforest. 1992, The World Bank, Washington, D.C., USA.
22. Israel, A.U.; Sunday, E.A.; Mansong S.; Ebong, U. Agro-based Raw materials and the chemical Industry in Nigeria. *Journal of Industrial Technology* 2016, *1*.
23. James, I.J. Problems of Book publishing industry in Nigeria: The Onibonje Publishers experience after 50 years. Available online <http://eprints.covenantuniversity.edu.ng/3281/1/Problems%20of%20the%20Book.pdf> accessed on 18/02/2019.
24. Larinde, S.L.; Akande, J.A.; Agbeja, B.O.; Ntabe, E. Prospects for wood products trade under the new partnership for Africa’s development. *J. Agric. Soc. Res.* **2010**, *10*, 10.

25. Essien, B.S. The Nigerian Business Environment and Growth Constraint of Micro and Small Scale Manufacturing Industries. *Am. Int. J. Soc. Sci.* **2014**, 3, 67–76.
26. Ekhuemelo, D.O.; Aidoko, V.O.; Tembe, E.T. Evaluation of Pulp and Paper making potentials of ficus Exasperata Vahl in Markurdi, Nigeria. *South Asian Journal of Biological Research.***2018**, 1, 61-78.
27. Kpikpi, W.M. A Study on wood anatomy on some Nigerian trees with potential for pulp and paper production. A PhD thesis submitted to department of Botany, Obafemi Awolowo University. 1986.
28. Udoakpan, U.I.; Njoku, K.U. Comparative study of some properties of pinus caribaea (Morelet) and Gmelina arborea(ROXB) grown in southern Nigeria for pulp and paper production. *Nigerian J. Agric. Environ.* **2016**, 12, 7–10.
29. Nwankwere, E.T.; Nwadiogbu, J.O.; Arebame, T.; Ukah, J.; Agu, C. Laboratories studies on the treatment of effluent from a pulp and paper mill using Activated carbon and sand filter media. *Am. Chem. Sci. J.* **2016**, 12, 1–14.
30. Ayodele, O.O. Effect of Recycling and re-use on pulp and paper properties. *Stud. J. Chem.* **2012**, 1, 15–22.
31. Adelagan, J.; Cola, P.A.; Lyytinen, K.; Green investment and organizational performance: Evidence from Nigeria Pulp and paper industry, June, 2018. Available online [http://www.greengrowthknowledge.org/sites/default/files/uploads/Joseph%20Adelegan%20et%20al%20-%20Green%20Investment%20and%20Organizational%20Performance\\_0.pdf](http://www.greengrowthknowledge.org/sites/default/files/uploads/Joseph%20Adelegan%20et%20al%20-%20Green%20Investment%20and%20Organizational%20Performance_0.pdf) Accessed on 2/19/2019.
32. Obiechina, G.O.; Rimande, J. Water pollution and Environmental Challenges in Nigeria. *Educ. Res. Int.* **2018**, 7, 109–117.
33. Kujur, S.K Globalization, Energy efficiency and material consumption in a resource based industry: A case of India's Pulp and Paper Industry 1980-81 to 2009-10. Available online [http://pupdepartments.ac.in/cdeiswebsite/papers/22%20Sandeep\\_CDS.pdf](http://pupdepartments.ac.in/cdeiswebsite/papers/22%20Sandeep_CDS.pdf) accessed 17/2/2019.
34. Voh, A.A.; Challenges and experiences of Agricultural Research Council of Nigeria (ARCN) in making agricultural research work for end-users in Nigeria. *Nigerian Agricultural Policy Research Journal* 2017, 3, pp10.
35. Akpan, S.N.; Ogunleye, M.B.; Abiola, J.K.; Nnate, F.N. Fibre Characteristics of Gerdenia Ternifornia (Linn C.) Schumacn for its Pulping potential. *Am. Sci. Res. J. Eng. Technol. Sci.* **2015**, 14, 322–332.
36. Ogunsile, B.O.; Omotoso, M.A., Onilude, M.A. Influence of operating variables on Soda pulping of musa paradisiaca Mid-Rib. *J. Appl. Sci.* **2006**, 6, 2922–2926.
37. Raw Material research and Development Council (RMRDC). Report on techno-Economic survey of the multi-disciplinary task force on pulp, paper products, printing and publishing sector. 1995, Lagos, Nigeria, 32pp.
38. Kupur, S.K. Declining energy intensity in the pulp and paper industry in India: Does traditional and advanced Inputs use make a difference. November, 2017. Available online [http://fgks.in/images/pdf/conf/2017/6\\_Sandeep.pdf](http://fgks.in/images/pdf/conf/2017/6_Sandeep.pdf) Accessed 19/2/2019.
39. Udeaja, R.A.; Nche, G.C. Ecological Impact of Paper production: A case for Abolition of Print media. *Acad. J. Interdiscip. Stud.* **2013**, 2, 139–148.
40. Ogunwusi, A.A., Ibrahim, H.D. Advances in Paper and pulp Technology and the Implication for the Paper industry in Nigeria. *Ind. Eng. Lett.* **2014**, 4, 3–11.
41. Aruofor, R. Forestry Outlook Studies in Africa: A brief on the Forestry outlook study, 2011. Available online: <http://www.fao.org/forestry/FON/FONs/outlook/Africa/AFRhom-e-stm>. Accessed on 12/10/2018.
42. Adegbohin, J.O., Omijeh, J.E. Raw Material for the Pulp and paper industry in Nigeria. *Commonwealth For. Rev.* **1989**, 68, 10.
43. Azeez, M.A., Andrew, J.E., Sithole, B.B. A preliminary investigation of Nigerian Gmelina arborea and Bambusa vulgaris for pulp and paper production . *Ciencia y tecnologia* 2016. 18, 65-78.
44. Schumacher, K.; Sathaye, J. India's paper Industry: Productivity and Efficiency. A Report of the Earnest Orland Lawrence Bakery. National Laboratory.1999.LBNL, 41843, pp37.
45. National Strategy for Competitiveness in Raw Material and Product Development in Nigeria. RMRDC. 2016. Pp 266.
46. Ibrahim, H.D.; Hammanga, S.I., Wali, S.L., Aniebue, E., N. Policy brief on the Production of toilet paper in Nigeria. RMRDC, Abuja, 2015.52pp.
47. National Strategy for Competitiveness in Raw material and Products Development In Nigeria: Implementation Plan .RMRDC, 2017. Pp 154.

48. RMRDC. Raw material sourcing for manufacturing in Nigeria. Raw Material Research and Development Council, Abuja, Nigeria. 2009 4<sup>th</sup> edition.
49. Nairametrics. Nigeria loses N180 billion due to collapse of 3 paper mills. Available on <https://nairametrics.com/2015/09/21/nigeria-loses-n180bn-due-to-the-collapse-of-3-paper-mills/> (Accessed on 16/06/2017).
